# Supplementary material for: Gentle interactions with restrained and free-moving cows: Effects on the improvement of the animal-human relationship
Source: PLoS One. 2020 Nov 23;15(11):e0242873. doi: 10.1371/journal.pone.0242873 (PMC7682860; doi:10.1371/journal.pone.0242873)
Supplement: S1 File — (XLSX) [file pone.0242873.s005.xlsx]

## Sheet: Avoidance
ID	herd	treatment	test	person	familiarity	date	time of day	AD (m)	ADtouch	remarks
17503	horn	con	1	AH	unf	2019-01-23	PM	0.4	9
17503	horn	con	2	AH	unf	2019-02-07	AM	0.2	9
17503	horn	con	3	AH	unf	2019-02-21	AM	0	8
17503	horn	con	4	AH	unf	2019-03-07	AM	1.1	9
17503	horn	con	5	AH	unf	2019-03-21	AM	0.1	9
17519	horn	con	1	AH	unf	2019-01-23	PM	2.2	9
17519	horn	con	2	AH	unf	2019-02-07	AM	1.4	9
17519	horn	con	3	AH	unf	2019-02-21	AM	1.4	9
17519	horn	con	4	AH	unf	2019-03-07	AM	0.8	9
17519	horn	con	5	AH	unf	2019-03-21	AM	1.4	9
17588	horn	con	1	AH	unf	2019-01-24	AM	2	9
17588	horn	con	2	AH	unf	2019-02-07	AM	0	8
17588	horn	con	3	AH	unf	2019-02-21	AM	1.4	9
17588	horn	con	4	AH	unf	2019-03-07	AM	0.1	9
17588	horn	con	5	AH	unf	2019-03-21	AM	0.1	9
98015	horn	con	1	AH	unf	2019-01-24	AM	1.1	9
98015	horn	con	2	AH	unf	2019-02-07	AM	0	4
98015	horn	con	3	AH	unf	2019-02-21	AM	0	4
98015	horn	con	4	AH	unf	2019-03-07	AM	0	4
98015	horn	con	5	AH	unf	2019-03-21	AM	0	4
98024	horn	con	1	AH	unf	2019-01-23	PM	0	7
98024	horn	con	2	AH	unf	2019-02-07	AM	1.1	9
98024	horn	con	3	AH	unf	2019-02-21	AM	0	7
98024	horn	con	4	AH	unf	2019-03-07	AM	0	7
98024	horn	con	5	AH	unf	2019-03-21	AM	0	6
98051	horn	con	1	AH	unf	2019-01-23	PM	2	9
98051	horn	con	2	AH	unf	2019-02-07	AM	2	9
98051	horn	con	3	AH	unf	2019-02-21	AM	2.2	9
98051	horn	con	4	AH	unf	2019-03-07	AM	0.3	9
98051	horn	con	5	AH	unf	2019-03-21	AM	1.4	9
17589	horn	free	1	AH	unf	2019-01-23	PM	2	9
17589	horn	free	2	AH	unf	2019-02-07	AM	0.8	9
17589	horn	free	3	AH	unf	2019-02-21	AM	0.2	9
17589	horn	free	4	AH	unf	2019-03-07	AM	0	4
17589	horn	free	5	AH	unf	2019-03-21	AM	0	4
17594	horn	free	1	AH	unf	2019-01-24	AM	2.2	9
17594	horn	free	2	AH	unf	2019-02-07	AM	0.1	9
17594	horn	free	3	AH	unf	2019-02-21	AM	1.4	9
17594	horn	free	4	AH	unf	2019-03-07	AM	0.2	9
17594	horn	free	5	AH	unf	2019-03-21	AM	0.1	9
45829	horn	free	1	AH	unf	2019-01-24	AM	2.5	9	oestrous
45829	horn	free	2	AH	unf	2019-02-07	AM	0.2	9
45829	horn	free	3	AH	unf	2019-02-22	AM	0	8
45829	horn	free	4	AH	unf	2019-03-07	AM	0.1	9
45829	horn	free	5	AH	unf	2019-03-21	AM	0	5
73496	horn	free	1	AH	unf	2019-01-23	PM	1.4	9
73496	horn	free	2	AH	unf	2019-02-07	AM	2.2	9
73496	horn	free	3	AH	unf	2019-02-21	AM	1.7	9
73496	horn	free	4	AH	unf	2019-03-07	AM	1.4	9
73496	horn	free	5	AH	unf	2019-03-21	AM	2	9
73497	horn	free	1	AH	unf	2019-01-24	AM	0.3	9
73497	horn	free	2	AH	unf	2019-02-07	AM	0.4	9
73497	horn	free	3	AH	unf	2019-02-21	AM	1.1	9
73497	horn	free	4	AH	unf	2019-03-07	AM	0.1	9
73497	horn	free	5	AH	unf	2019-03-22	AM	0.2	9
98063	horn	free	1	AH	unf	2019-01-23	PM	0.5	9
98063	horn	free	2	AH	unf	2019-02-07	AM	0	7
98063	horn	free	3	AH	unf	2019-02-21	AM	0	4
98063	horn	free	4	AH	unf	2019-03-07	AM	0	4
98063	horn	free	5	AH	unf	2019-03-21	AM	0	4
17547	horn	lock	1	AH	unf	2019-01-23	PM	2	9
17547	horn	lock	2	AH	unf	2019-02-07	AM	1.4	9
17547	horn	lock	3	AH	unf	2019-02-21	AM	1.7	9
17547	horn	lock	4	AH	unf	2019-03-07	AM	0.8	9
17547	horn	lock	5	AH	unf	2019-03-22	AM	0.8	9
45805	horn	lock	1	AH	unf	2019-01-23	PM	0.3	9
45805	horn	lock	2	AH	unf	2019-02-07	AM	0	7
45805	horn	lock	3	AH	unf	2019-02-21	AM	0	4
45805	horn	lock	4	AH	unf	2019-03-08	AM	0.1	9
45805	horn	lock	5	AH	unf	2019-03-21	AM	0	4
45827	horn	lock	1	AH	unf	2019-01-23	PM	1.1	9
45827	horn	lock	2	AH	unf	2019-02-07	AM	1.1	9
45827	horn	lock	3	AH	unf	2019-02-21	AM	0.8	9
45827	horn	lock	4	AH	unf	2019-03-07	AM	0.8	9
45827	horn	lock	5	AH	unf	2019-03-21	AM	1.4	9
45890	horn	lock	1	AH	unf	2019-01-23	PM	0.4	9
45890	horn	lock	2	AH	unf	2019-02-07	AM	1.1	9
45890	horn	lock	3	AH	unf	2019-02-21	AM	1.1	9
45890	horn	lock	4	AH	unf	2019-03-07	AM	0	7
45890	horn	lock	5	AH	unf	2019-03-21	AM	1.1	9
73418	horn	lock	1	AH	unf	2019-01-23	PM	1.1	9
73418	horn	lock	2	AH	unf	2019-02-07	AM	1.1	9
73418	horn	lock	3	AH	unf	2019-02-21	AM	0	7
73418	horn	lock	4	AH	unf	2019-03-08	AM	1.4	9
73418	horn	lock	5	AH	unf	2019-03-21	AM	0.8	9
73438	horn	lock	1	AH	unf	2019-01-23	PM	0.1	9
73438	horn	lock	2	AH	unf	2019-02-07	AM	0.2	9
73438	horn	lock	3	AH	unf	2019-02-21	AM	0	6
73438	horn	lock	4	AH	unf	2019-03-07	AM	0	4
73438	horn	lock	5	AH	unf	2019-03-21	AM	1.1	9
17503	horn	con	1	AL	fam	2019-01-23	AM	1.9	9
17503	horn	con	2	AL	fam	2019-02-07	AM	1.4	9
17503	horn	con	3	AL	fam	2019-02-21	AM	1.1	9
17503	horn	con	4	AL	fam	2019-03-07	AM	0.3	9
17503	horn	con	5	AL	fam	2019-03-21	AM	0.4	9
17519	horn	con	1	AL	fam	2019-01-23	AM	1.9	9
17519	horn	con	2	AL	fam	2019-02-07	AM	1.6	9
17519	horn	con	3	AL	fam	2019-02-21	AM	0.8	9
17519	horn	con	4	AL	fam	2019-03-07	AM	1.4	9
17519	horn	con	5	AL	fam	2019-03-21	AM	0.8	9
17588	horn	con	1	AL	fam	2019-01-23	AM	1.4	9
17588	horn	con	2	AL	fam	2019-02-07	AM	0.4	9
17588	horn	con	3	AL	fam	2019-02-21	AM	0.2	9
17588	horn	con	4	AL	fam	2019-03-07	AM	0.3	9
17588	horn	con	5	AL	fam	2019-03-21	AM	0	7
98015	horn	con	1	AL	fam	2019-01-23	AM	1.4	9
98015	horn	con	2	AL	fam	2019-02-07	AM	0	4
98015	horn	con	3	AL	fam	2019-02-21	AM	0	4
98015	horn	con	4	AL	fam	2019-03-07	AM	0	4
98015	horn	con	5	AL	fam	2019-03-21	AM	0.2	9
98024	horn	con	1	AL	fam	2019-01-23	AM	1.1	9
98024	horn	con	2	AL	fam	2019-02-07	AM	0	6
98024	horn	con	3	AL	fam	2019-02-21	AM	1.6	9
98024	horn	con	4	AL	fam	2019-03-07	AM	0	5
98024	horn	con	5	AL	fam	2019-03-21	AM	0	4
98051	horn	con	1	AL	fam	2019-01-23	AM	1.6	9
98051	horn	con	2	AL	fam	2019-02-07	AM	1.4	9
98051	horn	con	3	AL	fam	2019-02-21	AM	1.6	9
98051	horn	con	4	AL	fam	2019-03-07	AM	1.4	9
98051	horn	con	5	AL	fam	2019-03-21	AM	0.8	9
17589	horn	free	1	AL	fam	2019-01-23	AM	1.4	9
17589	horn	free	2	AL	fam	2019-02-07	AM	0.1	9
17589	horn	free	3	AL	fam	2019-02-21	AM	0.3	9
17589	horn	free	4	AL	fam	2019-03-07	AM	0	4
17589	horn	free	5	AL	fam	2019-03-21	AM	0	7
17594	horn	free	1	AL	fam	2019-01-23	AM	1.6	9
17594	horn	free	2	AL	fam	2019-02-07	AM	0.8	9
17594	horn	free	3	AL	fam	2019-02-21	AM	0.8	9
17594	horn	free	4	AL	fam	2019-03-07	AM	0.1	9
17594	horn	free	5	AL	fam	2019-03-21	AM	0.1	9
45829	horn	free	1	AL	fam	2019-01-23	AM	1.1	9
45829	horn	free	2	AL	fam	2019-02-07	AM	0.1	9
45829	horn	free	3	AL	fam	2019-02-21	AM	0.8	9
45829	horn	free	4	AL	fam	2019-03-07	AM	0	8
45829	horn	free	5	AL	fam	2019-03-21	AM	0	6
73496	horn	free	1	AL	fam	2019-01-23	AM	1.4	9
73496	horn	free	2	AL	fam	2019-02-07	AM	0.4	9
73496	horn	free	3	AL	fam	2019-02-21	AM	1.1	9
73496	horn	free	4	AL	fam	2019-03-07	AM	0.4	9
73496	horn	free	5	AL	fam	2019-03-21	AM	1.1	9
73497	horn	free	1	AL	fam	2019-01-23	AM	1.4	9
73497	horn	free	2	AL	fam	2019-02-07	AM	1.4	9
73497	horn	free	3	AL	fam	2019-02-21	AM	0.2	9
73497	horn	free	4	AL	fam	2019-03-07	AM	0	8
73497	horn	free	5	AL	fam	2019-03-21	AM	0.1	9
98063	horn	free	1	AL	fam	2019-01-23	AM	1.9	9
98063	horn	free	2	AL	fam	2019-02-07	AM	0	4
98063	horn	free	3	AL	fam	2019-02-21	AM	0	4
98063	horn	free	4	AL	fam	2019-03-07	AM	0	4
98063	horn	free	5	AL	fam	2019-03-21	AM	0	4
17547	horn	lock	1	AL	fam	2019-01-23	AM	1.9	9
17547	horn	lock	2	AL	fam	2019-02-07	AM	1.6	9
17547	horn	lock	3	AL	fam	2019-02-21	AM	1.6	9
17547	horn	lock	4	AL	fam	2019-03-07	AM	0.4	9
17547	horn	lock	5	AL	fam	2019-03-21	AM	0.1	9
45805	horn	lock	1	AL	fam	2019-01-23	AM	2.4	9
45805	horn	lock	2	AL	fam	2019-02-07	AM	0	7
45805	horn	lock	3	AL	fam	2019-02-21	AM	0.1	9
45805	horn	lock	4	AL	fam	2019-03-07	AM	0	8
45805	horn	lock	5	AL	fam	2019-03-21	AM	0	7
45827	horn	lock	1	AL	fam	2019-01-23	AM	1.1	9
45827	horn	lock	2	AL	fam	2019-02-07	AM	0.8	9
45827	horn	lock	3	AL	fam	2019-02-21	AM	0.8	9
45827	horn	lock	4	AL	fam	2019-03-07	AM	1.1	9
45827	horn	lock	5	AL	fam	2019-03-21	AM	0.2	9
45890	horn	lock	1	AL	fam	2019-01-23	AM	1.6	9
45890	horn	lock	2	AL	fam	2019-02-07	AM	0.3	9
45890	horn	lock	3	AL	fam	2019-02-21	AM	0.2	9
45890	horn	lock	4	AL	fam	2019-03-07	AM	0.2	9
45890	horn	lock	5	AL	fam	2019-03-21	AM	0.1	9
73418	horn	lock	1	AL	fam	2019-01-23	AM	1.4	9
73418	horn	lock	2	AL	fam	2019-02-07	AM	0.3	9
73418	horn	lock	3	AL	fam	2019-02-21	AM	0.8	9
73418	horn	lock	4	AL	fam	2019-03-07	AM	1.4	9
73418	horn	lock	5	AL	fam	2019-03-21	AM	0	7
73438	horn	lock	1	AL	fam	2019-01-23	AM	1.4	9
73438	horn	lock	2	AL	fam	2019-02-07	AM	0.1	9
73438	horn	lock	3	AL	fam	2019-02-21	AM	0	7
73438	horn	lock	4	AL	fam	2019-03-07	AM	0.1	9
73438	horn	lock	5	AL	fam	2019-03-21	AM	0	7
32350	mix	con	1	AH	fam	2019-01-23	AM	2	9
32350	mix	con	2	AH	fam	2019-02-07	AM	1.7	9
32350	mix	con	3	AH	fam	2019-02-22	AM	0.8	9
32350	mix	con	4	AH	fam	2019-03-07	AM	0.3	9
32350	mix	con	5	AH	fam	2019-03-21	AM	1.4	9
45818	mix	con	1	AH	fam	2019-01-23	PM	1.1	9
45818	mix	con	2	AH	fam	2019-02-07	AM	1.4	9
45818	mix	con	3	AH	fam	2019-02-22	AM	0.3	9
45818	mix	con	4	AH	fam	2019-03-07	AM	1.4	9
45818	mix	con	5	AH	fam	2019-03-21	AM	1.1	9
45888	mix	con	1	AH	fam	2019-01-23	AM	0.3	9
45888	mix	con	2	AH	fam	2019-02-07	AM	0.2	9
45888	mix	con	3	AH	fam	2019-02-21	AM	0	8
45888	mix	con	4	AH	fam	2019-03-07	AM	0.1	9
45888	mix	con	5	AH	fam	2019-03-21	AM	0.1	9
73491	mix	con	1	AH	fam	2019-01-23	AM	2	9
73491	mix	con	2	AH	fam	2019-02-08	AM	1.1	9
73491	mix	con	3	AH	fam	2019-02-21	AM	1.1	9
73491	mix	con	4	AH	fam	2019-03-07	AM	1.1	9
73491	mix	con	5	AH	fam	2019-03-21	AM	0.8	9
98007	mix	con	1	AH	fam	2019-01-23	AM	2	9
98007	mix	con	2	AH	fam	2019-02-07	AM	2.2	9
98007	mix	con	3	AH	fam	2019-02-21	AM	1.7	9
98007	mix	con	4	AH	fam	2019-03-07	AM	1.7	9
98007	mix	con	5	AH	fam	2019-03-21	AM	1.4	9
98059	mix	con	1	AH	fam	2019-01-23	AM	2.5	9
98059	mix	con	2	AH	fam	2019-02-07	AM	1.7	9
98059	mix	con	3	AH	fam	2019-02-21	AM	2.2	9
98059	mix	con	4	AH	fam	2019-03-07	AM	1.4	9
98059	mix	con	5	AH	fam	2019-03-21	AM	2	9
17508	mix	free	1	AH	fam	2019-01-23	AM	1.7	9
17508	mix	free	2	AH	fam	2019-02-07	AM	1.7	9
17508	mix	free	3	AH	fam	2019-02-21	AM	1.4	9
17508	mix	free	4	AH	fam	2019-03-07	AM	1.1	9
17508	mix	free	5	AH	fam	2019-03-21	AM	0.3	9
45847	mix	free	1	AH	fam	2019-01-23	AM	2.4	9
45847	mix	free	2	AH	fam	2019-02-07	AM	1.4	9
45847	mix	free	3	AH	fam	2019-02-21	AM	1.1	9
45847	mix	free	4	AH	fam	2019-03-07	AM	0.8	9
45847	mix	free	5	AH	fam	2019-03-21	AM	1.1	9
45859	mix	free	1	AH	fam	2019-01-23	AM	0.4	9
45859	mix	free	2	AH	fam	2019-02-07	AM	0.4	9
45859	mix	free	3	AH	fam	2019-02-21	AM	0.8	9
45859	mix	free	4	AH	fam	2019-03-07	AM	0	8
45859	mix	free	5	AH	fam	2019-03-21	AM	0	8
73471	mix	free	1	AH	fam	2019-01-23	AM	1.1	9
73471	mix	free	2	AH	fam	2019-02-07	AM	0.8	9
73471	mix	free	3	AH	fam	2019-02-21	AM	0.1	9
73471	mix	free	4	AH	fam	2019-03-07	AM	0	8
73471	mix	free	5	AH	fam	2019-03-21	AM	0.2	9
98062	mix	free	1	AH	fam	2019-01-23	AM	1.7	9
98062	mix	free	2	AH	fam	2019-02-07	AM	1.1	9
98062	mix	free	3	AH	fam	2019-02-21	AM	0	7
98062	mix	free	4	AH	fam	2019-03-07	AM	0	4
98062	mix	free	5	AH	fam	2019-03-21	AM	0	4
98073	mix	free	1	AH	fam	2019-01-23	AM	2.2	9
98073	mix	free	2	AH	fam	2019-02-07	AM	1.4	9
98073	mix	free	3	AH	fam	2019-02-21	AM	0.2	9
98073	mix	free	4	AH	fam	2019-03-07	AM	0	4
98073	mix	free	5	AH	fam	2019-03-21	AM	0	4
17590	mix	lock	1	AH	fam	2019-01-23	AM	1.7	9
17590	mix	lock	2	AH	fam	2019-02-07	AM	1.7	9
17590	mix	lock	3	AH	fam	2019-02-21	AM	1.4	9
17590	mix	lock	4	AH	fam	2019-03-07	AM	1.4	9
17590	mix	lock	5	AH	fam	2019-03-21	AM	1.4	9
24308	mix	lock	1	AH	fam	2019-01-23	AM	1.4	9
24308	mix	lock	2	AH	fam	2019-02-07	AM	0.4	9
24308	mix	lock	3	AH	fam	2019-02-21	AM	1.1	9
32359	mix	lock	1	AH	fam	2019-01-23	AM	2.2	9
32359	mix	lock	2	AH	fam	2019-02-07	AM	1.4	9
32359	mix	lock	3	AH	fam	2019-02-21	AM	0.8	9
32359	mix	lock	4	AH	fam	2019-03-07	AM	1.1	9
32359	mix	lock	5	AH	fam	2019-03-21	AM	0	8
45886	mix	lock	1	AH	fam	2019-01-23	AM	1.4	9
45886	mix	lock	2	AH	fam	2019-02-07	AM	0.8	9
45886	mix	lock	3	AH	fam	2019-02-21	AM	0	8
45886	mix	lock	4	AH	fam	2019-03-07	AM	0	4
45886	mix	lock	5	AH	fam	2019-03-21	AM	0	4
45889	mix	lock	1	AH	fam	2019-01-23	AM	1.1	9
45889	mix	lock	2	AH	fam	2019-02-07	AM	0.8	9
45889	mix	lock	4	AH	fam	2019-03-07	AM	0.1	9	threat
45889	mix	lock	5	AH	fam	2019-03-21	AM	0	8
98023	mix	lock	1	AH	fam	2019-01-23	AM	2.2	9
98023	mix	lock	2	AH	fam	2019-02-07	AM	1.1	9
98023	mix	lock	3	AH	fam	2019-02-21	AM	0.2	9
98023	mix	lock	4	AH	fam	2019-03-07	AM	0.1	9
98023	mix	lock	5	AH	fam	2019-03-21	AM	1.1	9
32350	mix	con	1	AL	unf	2019-01-24	AM	1.6	9
32350	mix	con	2	AL	unf	2019-02-08	AM	1.4	9
32350	mix	con	3	AL	unf	2019-02-21	AM	1.9	9
32350	mix	con	4	AL	unf	2019-03-07	AM	1.6	9
32350	mix	con	5	AL	unf	2019-03-21	AM	0.8	9
45818	mix	con	1	AL	unf	2019-01-23	PM	1.1	9
45818	mix	con	2	AL	unf	2019-02-07	AM	1.1	9
45818	mix	con	3	AL	unf	2019-02-21	AM	1.6	9
45818	mix	con	4	AL	unf	2019-03-07	AM	1.4	9
45818	mix	con	5	AL	unf	2019-03-21	AM	1.4	9
45888	mix	con	1	AL	unf	2019-01-23	PM	0.3	9
45888	mix	con	2	AL	unf	2019-02-07	AM	0.8	9
45888	mix	con	3	AL	unf	2019-02-21	AM	0.1	9
45888	mix	con	4	AL	unf	2019-03-08	AM	0	6
45888	mix	con	5	AL	unf	2019-03-21	AM	0.1	9
73491	mix	con	1	AL	unf	2019-01-23	PM	1.4	9
73491	mix	con	2	AL	unf	2019-02-08	AM	0.8	9
73491	mix	con	3	AL	unf	2019-02-21	AM	1.1	9
73491	mix	con	4	AL	unf	2019-03-07	AM	0.4	9
73491	mix	con	5	AL	unf	2019-03-21	AM	0.3	9
98007	mix	con	1	AL	unf	2019-01-23	PM	1.9	9
98007	mix	con	2	AL	unf	2019-02-07	AM	1.6	9
98007	mix	con	3	AL	unf	2019-02-21	AM	1.6	9
98007	mix	con	4	AL	unf	2019-03-07	AM	1.9	9
98007	mix	con	5	AL	unf	2019-03-21	AM	1.6	9
98059	mix	con	2	AL	unf	2019-02-07	AM	2.2	9
98059	mix	con	3	AL	unf	2019-02-21	AM	2.2	9
98059	mix	con	4	AL	unf	2019-03-07	AM	2.2	9
98059	mix	con	5	AL	unf	2019-03-22	AM	2.4	9
17508	mix	free	1	AL	unf	2019-01-23	PM	1.6	9
17508	mix	free	2	AL	unf	2019-02-07	AM	1.6	9
17508	mix	free	3	AL	unf	2019-02-21	AM	1.4	9
17508	mix	free	4	AL	unf	2019-03-07	AM	2.2	9
17508	mix	free	5	AL	unf	2019-03-21	AM	0.5	9
45847	mix	free	1	AL	unf	2019-01-23	PM	2.2	9
45847	mix	free	2	AL	unf	2019-02-07	AM	1.4	9
45847	mix	free	3	AL	unf	2019-02-21	AM	1.1	9
45847	mix	free	4	AL	unf	2019-03-07	AM	1.6	9
45847	mix	free	5	AL	unf	2019-03-21	AM	0.8	9
45859	mix	free	1	AL	unf	2019-01-23	PM	0.3	9
45859	mix	free	2	AL	unf	2019-02-08	AM	1.1	9
45859	mix	free	3	AL	unf	2019-02-21	AM	0.1	9
45859	mix	free	4	AL	unf	2019-03-08	AM	0.4	9
45859	mix	free	5	AL	unf	2019-03-22	AM	0	8
73471	mix	free	1	AL	unf	2019-01-23	PM	1.1	9
73471	mix	free	2	AL	unf	2019-02-07	AM	1.4	9
73471	mix	free	3	AL	unf	2019-02-21	AM	0.5	9
73471	mix	free	4	AL	unf	2019-03-07	AM	0.1	9
73471	mix	free	5	AL	unf	2019-03-21	AM	0.3	9
98062	mix	free	1	AL	unf	2019-01-23	PM	1.6	9
98062	mix	free	2	AL	unf	2019-02-07	AM	0.2	9
98062	mix	free	3	AL	unf	2019-02-21	AM	1.4	9
98062	mix	free	4	AL	unf	2019-03-07	AM	0	4
98062	mix	free	5	AL	unf	2019-03-21	AM	0	4
98073	mix	free	1	AL	unf	2019-01-24	AM	1.1	9
98073	mix	free	2	AL	unf	2019-02-07	AM	1.6	9
98073	mix	free	3	AL	unf	2019-02-21	AM	0.2	9
98073	mix	free	4	AL	unf	2019-03-07	AM	0.1	9
98073	mix	free	5	AL	unf	2019-03-22	AM	0	8
17590	mix	lock	1	AL	unf	2019-01-23	PM	1.4	9
17590	mix	lock	2	AL	unf	2019-02-07	AM	1.4	9
17590	mix	lock	3	AL	unf	2019-02-21	AM	1.6	9
17590	mix	lock	4	AL	unf	2019-03-07	AM	1.4	9
17590	mix	lock	5	AL	unf	2019-03-21	AM	2.2	9
24308	mix	lock	1	AL	unf	2019-01-24	AM	1.6	9
24308	mix	lock	2	AL	unf	2019-02-07	AM	1.1	9
24308	mix	lock	3	AL	unf	2019-02-21	AM	0.1	9
32359	mix	lock	1	AL	unf	2019-01-23	PM	0.4	9
32359	mix	lock	2	AL	unf	2019-02-08	AM	1.6	9
32359	mix	lock	3	AL	unf	2019-02-21	AM	0.8	9
32359	mix	lock	4	AL	unf	2019-03-07	AM	0.4	9
32359	mix	lock	5	AL	unf	2019-03-21	AM	0.2	9
45886	mix	lock	1	AL	unf	2019-01-23	PM	1.6	9
45886	mix	lock	2	AL	unf	2019-02-07	AM	0	8
45886	mix	lock	3	AL	unf	2019-02-21	AM	0.2	9
45886	mix	lock	4	AL	unf	2019-03-07	AM	0	4
45886	mix	lock	5	AL	unf	2019-03-21	AM	0	4
45889	mix	lock	1	AL	unf	2019-01-24	AM	0.8	9
45889	mix	lock	2	AL	unf	2019-02-07	AM	0.1	9
45889	mix	lock	4	AL	unf	2019-03-08	AM	0	8
45889	mix	lock	5	AL	unf	2019-03-21	AM	0.3	9
98023	mix	lock	1	AL	unf	2019-01-23	PM	1.6	9
98023	mix	lock	2	AL	unf	2019-02-07	AM	0.8	9
98023	mix	lock	3	AL	unf	2019-02-21	AM	0.1	9
98023	mix	lock	4	AL	unf	2019-03-07	AM	1.4	9
98023	mix	lock	5	AL	unf	2019-03-21	AM	0.1	9

## Sheet: InfoADtouch
AD	Definition	ADtouch
0S5	stroking possible for 5 s	4
0S4	stroking possible for 4 s	5
0S3	stroking possible for 3 s	5
0S2	stroking possible for 2 s	6
0S1	stroking possible for 1 s	6
0B	possible to touch (but not to stroke)	7
0A	avoidance at touching	8
AD > 0	not possible to touch	9

## Sheet: Approach
ID	herd	treatment	test	date	time of day	latency to 1m (s)	latency to contact (s)	duration of contact (s)	lat1m_binom	latcont_binom
17503	horn	con	1	2019-01-24	AM	46	66	7	1	1
17503	horn	con	2	2019-02-08	AM	5	7	3	1	1
17503	horn	con	3	2019-02-22	AM	20	28	35	1	1
17503	horn	con	4	08.03.2019	AM	11	180	0	1	0
17503	horn	con	5	2019-03-22	AM	180	180	0	0	0
17519	horn	con	1	2019-01-24	PM	180	180	0	0	0
17519	horn	con	2	2019-02-08	AM	180	180	0	0	0
17519	horn	con	3	2019-02-22	AM	180	180	0	0	0
17519	horn	con	4	08.03.2019	AM	46	180	0	1	0
17519	horn	con	5	2019-03-22	AM	180	180	0	0	0
17588	horn	con	1	2019-01-24	AM	180	180	0	0	0
17588	horn	con	2	2019-02-08	AM	180	180	0	0	0
17588	horn	con	3	2019-02-22	AM	78	80	18	1	1
17588	horn	con	4	08.03.2019	AM	180	180	0	0	0
17588	horn	con	5	2019-03-22	AM	180	180	0	0	0
98015	horn	con	1	2019-01-25	AM	180	180	0	0	0
98015	horn	con	2	2019-02-08	AM	20	62	11	1	1
98015	horn	con	3	2019-02-22	AM	39	95	85	1	1
98015	horn	con	4	08.03.2019	AM	36	42	10	1	1
98015	horn	con	5	2019-03-22	AM	6	8	12	1	1
98024	horn	con	1	2019-01-25	AM	180	180	0	0	0
98024	horn	con	2	2019-02-08	AM	180	180	0	0	0
98024	horn	con	3	2019-02-22	AM	180	180	0	0	0
98024	horn	con	4	08.03.2019	AM	5	10	3	1	1
98024	horn	con	5	2019-03-22	AM	62	180	0	1	0
98051	horn	con	1	2019-01-25	AM	180	180	0	0	0
98051	horn	con	2	2019-02-08	AM	180	180	0	0	0
98051	horn	con	3	2019-02-22	AM	180	180	0	0	0
98051	horn	con	4	08.03.2019	AM	180	180	0	0	0
98051	horn	con	5	2019-03-22	AM	180	180	0	0	0
17547	horn	lock	1	2019-01-24	PM	180	180	0	0	0
17547	horn	lock	2	2019-02-08	AM	180	180	0	0	0
17547	horn	lock	3	2019-02-22	AM	180	180	0	0	0
17547	horn	lock	4	08.03.2019	AM	180	180	0	0	0
17547	horn	lock	5	2019-03-22	AM	54	180	0	1	0
45805	horn	lock	1	2019-01-25	AM	180	180	0	0	0
45805	horn	lock	2	2019-02-08	AM	180	180	0	0	0
45805	horn	lock	3	2019-02-22	AM	28	32	148	1	1
45805	horn	lock	4	08.03.2019	AM	2	5	75	1	1
45805	horn	lock	5	2019-03-22	AM	12	80	2	1	1
45827	horn	lock	1	2019-01-25	AM	180	180	0	0	0
45827	horn	lock	2	2019-02-08	AM	180	180	0	0	0
45827	horn	lock	3	2019-02-22	AM	180	180	0	0	0
45827	horn	lock	4	08.03.2019	AM	129	180	0	1	0
45827	horn	lock	5	2019-03-22	AM	180	180	0	0	0
45890	horn	lock	1	2019-01-24	PM	180	180	0	0	0
45890	horn	lock	2	2019-02-08	AM	180	180	0	0	0
45890	horn	lock	3	2019-02-22	AM	180	180	0	0	0
45890	horn	lock	4	08.03.2019	AM	180	180	0	0	0
45890	horn	lock	5	2019-03-22	AM	180	180	0	0	0
73418	horn	lock	1	2019-01-25	PM	180	180	0	0	0
73418	horn	lock	2	2019-02-08	AM	180	180	0	0	0
73418	horn	lock	3	2019-02-22	AM	29	37	1	1	1
73418	horn	lock	4	08.03.2019	AM	3	10	18	1	1
73418	horn	lock	5	2019-03-22	AM	180	180	0	0	0
73438	horn	lock	1	2019-01-24	AM	180	180	0	0	0
73438	horn	lock	2	2019-02-08	AM	61	120	10	1	1
73438	horn	lock	3	2019-02-22	AM	8	8	120	1	1
73438	horn	lock	4	08.03.2019	AM	2	176	0	1	1
73438	horn	lock	5	2019-03-22	AM	180	180	0	0	0
17589	horn	free	1	2019-01-24	PM	180	180	0	0	0
17589	horn	free	2	2019-02-08	AM	180	180	0	0	0
17589	horn	free	3	2019-02-22	AM	20	180	0	1	0
17589	horn	free	4	08.03.2019	AM	40	43	137	1	1
17589	horn	free	5	2019-03-22	AM	180	180	0	0	0
17594	horn	free	1	2019-01-24	AM	180	180	0	0	0
17594	horn	free	2	2019-02-08	AM	155	180	0	1	0
17594	horn	free	3	2019-02-22	AM	180	180	0	0	0
17594	horn	free	4	08.03.2019	AM	43	49	15	1	1
17594	horn	free	5	2019-03-22	AM	125	140	10	1	1
45829	horn	free	1	2019-01-25	AM	180	180	0	0	0
45829	horn	free	2	2019-02-08	AM	180	180	0	0	0
45829	horn	free	3	2019-02-22	AM	180	180	0	0	0
45829	horn	free	4	08.03.2019	AM	105	132	3	1	1
45829	horn	free	5	2019-03-22	AM	180	180	0	0	0
73496	horn	free	1	2019-01-25	PM	180	180	0	0	0
73496	horn	free	2	2019-02-08	AM	180	180	0	0	0
73496	horn	free	3	2019-02-22	AM	40	45	2	1	1
73496	horn	free	4	08.03.2019	AM	180	180	0	0	0
73496	horn	free	5	2019-03-22	AM	180	180	0	0	0
73497	horn	free	1	2019-01-24	PM	180	180	0	0	0
73497	horn	free	2	2019-02-08	AM	180	180	0	0	0
73497	horn	free	3	2019-02-22	AM	180	180	0	0	0
73497	horn	free	4	08.03.2019	AM	180	180	0	0	0
73497	horn	free	5	2019-03-22	AM	30	35	145	1	1
98063	horn	free	1	2019-01-24	PM	180	180	0	0	0
98063	horn	free	2	2019-02-08	AM	67	180	0	1	0
98063	horn	free	3	2019-02-22	AM	10	12	108	1	1
98063	horn	free	4	08.03.2019	AM	5	180	0	1	0
98063	horn	free	5	2019-03-22	AM	20	24	56	1	1
32350	mix	con	1	2019-01-24	PM	180	180	0	0	0
32350	mix	con	2	2019-02-08	AM	60	100	1	1	1
32350	mix	con	3	2019-02-22	AM	180	180	0	0	0
32350	mix	con	4	08.03.2019	AM	10	22	8	1	1
32350	mix	con	5	2019-03-22	AM	180	180	0	0	0
45818	mix	con	1	2019-01-25	AM	180	180	0	0	0
45818	mix	con	2	2019-02-08	AM	180	180	0	0	0
45818	mix	con	3	2019-02-22	AM	180	180	0	0	0
45818	mix	con	4	08.03.2019	AM	180	180	0	0	0
45818	mix	con	5	2019-03-22	AM	180	180	0	0	0
45888	mix	con	1	2019-01-24	PM	90	180	0	1	0
45888	mix	con	2	2019-02-08	AM	180	180	0	0	0
45888	mix	con	3	2019-02-22	AM	60	180	0	1	0
45888	mix	con	4	08.03.2019	AM	90	105	2	1	1
45888	mix	con	5	2019-03-22	AM	5	10	70	1	1
73491	mix	con	1	2019-01-24	PM	180	180	0	0	0
73491	mix	con	2	2019-02-08	AM	180	180	0	0	0
73491	mix	con	3	2019-02-22	AM	180	180	0	0	0
73491	mix	con	4	08.03.2019	AM	180	180	0	0	0
73491	mix	con	5	2019-03-22	AM	180	180	0	0	0
98007	mix	con	1	2019-01-24	PM	180	180	0	0	0
98007	mix	con	2	2019-02-08	AM	180	180	0	0	0
98007	mix	con	3	2019-02-22	AM	180	180	0	0	0
98007	mix	con	4	08.03.2019	AM	180	180	0	0	0
98007	mix	con	5	2019-03-22	AM	180	180	0	0	0
98059	mix	con	1	2019-01-25	AM	180	180	0	0	0
98059	mix	con	2	2019-02-08	AM	180	180	0	0	0
98059	mix	con	3	2019-02-22	AM	80	110	60	1	1
98059	mix	con	4	08.03.2019	AM	180	180	0	0	0
98059	mix	con	5	2019-03-22	AM	180	180	0	0	0
17590	mix	lock	1	2019-01-24	AM	180	180	0	0	0
17590	mix	lock	2	2019-02-08	AM	180	180	0	0	0
17590	mix	lock	3	2019-02-22	AM	180	180	0	0	0
17590	mix	lock	4	08.03.2019	AM	180	180	0	0	0
17590	mix	lock	5	2019-03-22	AM	180	180	0	0	0
24308	mix	lock	1	2019-01-24	PM	180	180	0	0	0
24308	mix	lock	2	2019-02-08	AM	180	180	0	0	0
24308	mix	lock	5	2019-03-22	AM	50	180	0	1	0
32359	mix	lock	1	2019-01-25	AM	30	180	0	1	0
32359	mix	lock	2	2019-02-08	AM	180	180	0	0	0
32359	mix	lock	3	2019-02-22	AM	180	180	0	0	0
32359	mix	lock	4	08.03.2019	AM	65	68	25	1	1
32359	mix	lock	5	2019-03-22	AM	118	180	0	1	0
45886	mix	lock	1	2019-01-24	AM	20	30	2	1	1
45886	mix	lock	2	2019-02-08	AM	10	180	0	1	0
45886	mix	lock	3	2019-02-22	AM	10	12	168	1	1
45886	mix	lock	4	08.03.2019	AM	60	79	35	1	1
45886	mix	lock	5	2019-03-22	AM	10	14	106	1	1
45889	mix	lock	1	2019-01-24	PM	180	180	0	0	0
45889	mix	lock	2	2019-02-08	AM	80	180	0	1	0
45889	mix	lock	4	08.03.2019	AM	60	180	0	1	0
45889	mix	lock	5	2019-03-22	AM	155	170	1	1	1
98023	mix	lock	1	2019-01-24	AM	180	180	0	0	0
98023	mix	lock	2	2019-02-08	AM	180	180	0	0	0
98023	mix	lock	3	2019-02-22	AM	180	180	0	0	0
98023	mix	lock	4	08.03.2019	AM	180	180	0	0	0
98023	mix	lock	5	2019-03-22	AM	30	180	0	1	0
17508	mix	free	1	2019-01-24	PM	180	180	0	0	0
17508	mix	free	2	2019-02-08	AM	145	180	0	1	0
17508	mix	free	3	2019-02-22	AM	180	180	0	0	0
17508	mix	free	4	08.03.2019	AM	100	180	0	1	0
17508	mix	free	5	2019-03-22	AM	180	180	0	0	0
45847	mix	free	1	2019-01-24	PM	140	180	0	1	0
45847	mix	free	2	2019-02-08	AM	180	180	0	0	0
45847	mix	free	3	2019-02-22	AM	180	180	0	0	0
45847	mix	free	4	08.03.2019	AM	89	180	0	1	0
45847	mix	free	5	2019-03-22	AM	180	180	0	0	0
45859	mix	free	1	2019-01-25	AM	180	180	0	0	0
45859	mix	free	2	2019-02-08	AM	180	180	0	0	0
45859	mix	free	3	2019-02-22	AM	180	180	0	0	0
45859	mix	free	4	08.03.2019	AM	180	180	0	0	0
45859	mix	free	5	2019-03-22	AM	63	180	0	1	0
73471	mix	free	1	2019-01-25	AM	180	180	0	0	0
73471	mix	free	2	2019-02-08	AM	180	180	0	0	0
73471	mix	free	3	2019-02-22	AM	180	180	0	0	0
73471	mix	free	4	08.03.2019	AM	50	51	2	1	1
73471	mix	free	5	2019-03-22	AM	10	15	165	1	1
98062	mix	free	1	2019-01-25	AM	180	180	0	0	0
98062	mix	free	2	2019-02-08	AM	100	120	20	1	1
98062	mix	free	3	2019-02-22	AM	20	30	120	1	1
98062	mix	free	4	08.03.2019	AM	1	1	180	1	1
98062	mix	free	5	2019-03-22	AM	10	11	168	1	1
98073	mix	free	1	2019-01-24	PM	180	180	0	0	0
98073	mix	free	2	2019-02-08	AM	20	25	1	1	1
98073	mix	free	3	2019-02-22	AM	180	180	0	0	0
98073	mix	free	4	08.03.2019	AM	59	107	43	1	1
98073	mix	free	5	2019-03-22	AM	60	80	100	1	1

## Sheet: behav_durations
ID	treatment record	date	herd	treatment	avoidance	exploperson	headplay	headshake	headtowardsperson	lickperson	looktowardsperson	lying	neckstretching	notvisible	reprimand	rubperson	standing	stroking	threat	walkaway
17547	1	300119	horn	lock	0	0	0	0	64	0	0	0	0	0	0	0	180	179	0	0
45805	1	300119	horn	lock	0	0	0	0	94	0	0	0	1	0	0	0	192	181	0	0
45827	1	300119	horn	lock	0	0	0	0	23	0	0	0	0	0	0	0	1	176	0	0
45890	1	300119	horn	lock	0	0	0	0	44	0	0	0	0	0	0	0	196	178	0	0
73418	1	300119	horn	lock	0	0	0	1	34	0	0	0	3	0	0	0	195	179	0	0
73438	1	300119	horn	lock	0	0	0	1	35	0	0	0	0	0	0	0	178	174	0	0
17589	1	300119	horn	free	11	8	0	0	8	0	14	0	0	2	0	0	194	130	0	0
17594	1	300119	horn	free	1	2	0	0	0	0	42	0	0	0	0	0	194	0	0	0
45829	1	300119	horn	free	0	0	0	0	0	0	0	180	89	0	0	0	0	158	0	0
73496	1	300119	horn	free	17	0	0	0	0	0	3	0	0	0	0	0	170	0	0	0
73497	1	300119	horn	free	15	2	0	6	0	0	30	0	0	4	0	0	180	0	0	0
98063	1	300119	horn	free	0	17	0	0	0	0	5	0	1	0	0	0	197	165	0	0
17590	1	300119	mix	lock	0	0	0	0	5	0	0	0	6	0	0	0	183	183	0	0
24308	1	300119	mix	lock	0	0	0	3	0	0	0	0	0	0	0	0	184	183	0	0
32359	1	300119	mix	lock	0	0	0	0	7	0	0	0	2	0	0	0	180	180	0	0
45886	1	300119	mix	lock	0	0	0	1	30	0	0	0	0	0	0	0	182	175	0	0
45889	1	300119	mix	lock	0	2	0	2	9	0	0	0	3	0	0	0	185	178	0	0
98023	1	300119	mix	lock	0	0	0	0	6	0	0	0	0	0	0	0	185	180	0	0
17508	1	300119	mix	free	0	0	0	1	0	0	0	175	0	0	0	0	0	72	0	0
45847	1	300119	mix	free	18	1	0	0	0	0	73	0	0	15	0	0	190	0	0	0
45859	1	300119	mix	free	7	3	0	2	0	0	0	55	0	0	0	0	10	1	0	0
73471	1	300119	mix	free	4	11	0	0	0	0	20	0	0	0	0	0	175	2	0	0
98062	1	300119	mix	free	25	43	0	1	0	13	17	0	11	0	0	0	113	29	0	0
98073	1	300119	mix	free	4	32	0	0	0	0	60	0	0	0	0	0	195	4	0	0
17547	2	060219	horn	lock	0	0	0	7	84	0	0	0	8	0	0	0	193	182	0	0
45805	2	060219	horn	lock	0	0	0	0	28	0	0	0	0	0	0	0	192	181	0	0
45827	2	060219	horn	lock	0	0	0	0	80	0	0	0	8	0	0	0	190	180	0	0
45890	2	060219	horn	lock	0	0	0	0	0	0	0	0	0	0	0	0	189	181	0	0
73418	2	060219	horn	lock	0	1	0	1	27	0	0	0	9	0	0	0	182	181	0	0
73438	2	060219	horn	lock	0	0	0	1	61	0	0	0	0	0	0	0	193	181	0	0
17589	2	060219	horn	free	3	41	0	1	0	2	6	0	0	0	0	0	179	121	0	0
17594	2	060219	horn	free	14	0	0	0	0	0	0	0	0	0	0	0	180	0	0	0
45829	2	060219	horn	free	14	3	0	0	0	0	18	0	13	0	0	0	180	39	0	0
73496	2	060219	horn	free	3	0	0	0	0	0	54	0	0	0	0	0	200	0	0	0
73497	2	060219	horn	free	3	0	0	14	0	0	28	0	0	0	0	0	180	0	0	0
98063	2	060219	horn	free	3	12	0	0	0	0	14	72	0	0	0	0	164	107	0	0
17590	2	060219	mix	lock	0	0	0	0	0	0	0	0	0	4	0	0	188	176	0	0
24308	2	060219	mix	lock	0	0	0	2	0	0	0	0	0	0	0	0	192	189	0	0
32359	2	060219	mix	lock	0	0	0	0	5	0	0	0	0	0	0	0	193	192	0	0
45886	2	060219	mix	lock	0	0	0	0	59	0	0	0	2	0	0	0	188	187	0	0
45889	2	060219	mix	lock	0	0	0	0	35	0	0	0	6	0	0	0	190	190	0	0
98023	2	060219	mix	lock	0	0	0	0	4	0	0	0	0	0	0	0	190	184	0	0
17508	2	060219	mix	free	0	0	0	0	0	0	0	184	0	0	0	0	0	176	0	0
45847	2	060219	mix	free	0	0	0	0	0	0	0	184	0	0	0	0	0	0	0	0
45859	2	060219	mix	free	0	0	0	0	0	0	0	168	0	0	0	0	0	0	0	0
73471	2	060219	mix	free	20	2	0	0	0	0	17	0	4	4	0	0	190	103	0	0
98062	2	060219	mix	free	24	17	0	2	0	0	17	0	0	2	0	0	95	0	0	0
98073	2	060219	mix	free	0	3	0	0	0	0	7	195	5	0	0	0	0	58	0	0
17547	3	130219	horn	lock	0	0	0	0	59	0	0	0	12	0	0	0	192	180	0	0
45805	3	130219	horn	lock	0	0	0	0	93	0	0	0	0	0	0	0	192	180	0	0
45827	3	130219	horn	lock	0	0	0	0	10	0	0	0	0	0	0	0	189	180	0	0
45890	3	130219	horn	lock	0	0	0	0	13	0	0	0	0	0	0	0	190	181	0	0
73418	3	130219	horn	lock	0	0	0	0	0	0	0	0	0	0	0	0	193	181	0	0
73438	3	130219	horn	lock	0	0	0	1	82	0	0	0	0	0	0	0	192	181	0	0
17589	3	130219	horn	free	0	0	0	0	0	0	0	193	6	0	0	0	0	159	0	0
17594	3	130219	horn	free	22	2	0	0	0	0	30	0	0	0	0	0	180	0	0	0
45829	3	130219	horn	free	9	17	0	0	0	6	4	0	14	0	0	0	180	99	0	0
73496	3	130219	horn	free	0	0	0	0	0	0	0	195	0	0	0	0	0	18	0	0
73497	3	130219	horn	free	21	1	0	20	0	0	19	0	0	0	0	0	180	5	0	0
98063	3	130219	horn	free	0	6	0	0	0	0	7	0	0	0	0	0	197	134	0	0
17590	3	130219	mix	lock	0	0	0	1	18	0	0	0	6	0	0	0	188	183	0	0
24308	3	130219	mix	lock	0	0	0	0	0	0	0	0	0	0	0	0	180	180	0	0
32359	3	130219	mix	lock	0	0	0	0	0	0	0	0	0	0	0	0	180	180	0	0
45886	3	130219	mix	lock	0	0	0	0	37	0	0	0	27	0	0	9	192	187	0	0
45889	3	130219	mix	lock	0	0	0	0	84	0	0	0	1	0	0	0	185	183	0	0
98023	3	130219	mix	lock	0	0	0	0	28	0	0	0	11	0	0	0	188	183	0	0
17508	3	130219	mix	free	0	0	0	0	0	0	0	186	0	0	0	0	0	178	0	0
45847	3	130219	mix	free	23	0	0	0	0	0	28	0	0	11	0	0	191	0	0	0
45859	3	130219	mix	free	14	2	0	0	2	0	2	0	4	25	0	0	167	86	0	0
73471	3	130219	mix	free	28	9	0	0	0	0	30	0	0	0	0	0	183	16	0	0
98062	3	130219	mix	free	11	34	0	0	15	23	27	0	21	0	0	7	203	120	0	0
98073	3	130219	mix	free	54	13	0	3	0	0	61	0	0	0	0	0	171	0	0	0
17547	4	200219	horn	lock	0	0	0	0	86	0	0	0	0	0	0	0	195	183	0	0
45805	4	200219	horn	lock	0	0	0	0	82	0	0	0	13	0	0	6	191	182	0	0
45827	4	200219	horn	lock	0	0	0	0	19	0	0	0	48	0	0	0	190	181	0	0
45890	4	200219	horn	lock	0	0	0	0	0	0	0	0	0	0	0	0	192	180	0	0
73418	4	200219	horn	lock	0	0	0	1	34	0	0	0	13	0	0	0	192	179	0	0
73438	4	200219	horn	lock	0	0	0	0	82	0	0	0	3	0	0	0	188	179	0	0
17589	4	200219	horn	free	9	6	0	0	27	9	2	0	17	0	0	0	212	167	0	0
17594	4	200219	horn	free	18	0	0	0	0	0	13	0	0	0	0	0	195	0	0	0
45829	4	200219	horn	free	2	5	0	0	0	11	0	0	0	0	0	0	109	151	0	0
73496	4	200219	horn	free	0	0	0	0	0	0	0	182	0	0	0	0	0	138	0	0
73497	4	200219	horn	free	17	2	0	6	0	0	5	0	0	0	0	0	180	52	0	0
98063	4	200219	horn	free	0	9	0	0	9	0	1	0	0	0	0	0	180	145	0	0
17590	4	200219	mix	lock	0	0	0	4	30	0	0	0	4	0	0	0	176	176	0	0
24308	4	200219	mix	lock	0	0	0	1	48	0	0	0	0	0	0	0	183	179	0	0
32359	4	200219	mix	lock	0	0	0	0	1	0	0	0	0	0	0	0	183	183	0	0
45886	4	200219	mix	lock	0	6	0	0	89	1	0	0	1	0	0	0	186	186	0	0
45889	4	200219	mix	lock	0	0	0	0	29	0	0	0	0	0	0	0	177	175	0	0
98023	4	200219	mix	lock	0	0	0	0	0	0	0	0	0	0	0	0	185	177	0	0
17508	4	200219	mix	free	0	0	0	0	29	0	0	189	0	0	0	0	0	164	0	0
45847	4	200219	mix	free	9	0	0	0	0	0	32	110	0	0	0	0	72	15	0	0
45859	4	200219	mix	free	27	17	0	1	1	0	2	125	0	7	0	0	76	123	0	0
73471	4	200219	mix	free	8	6	0	0	0	0	2	0	41	7	0	0	197	144	0	0
98062	4	200219	mix	free	3	32	0	0	0	34	10	0	19	4	0	0	200	161	0	0
98073	4	200219	mix	free	0	64	0	0	0	0	2	192	19	1	0	0	0	165	0	0
17547	5	010319	horn	lock	0	0	0	0	111	0	4	0	11	0	0	0	193	183	0	0
45805	5	010319	horn	lock	0	0	0	3	113	0	0	0	1	0	0	0	187	179	0	0
45827	5	010319	horn	lock	0	0	0	0	31	0	0	0	0	0	0	0	189	181	0	0
45890	5	010319	horn	lock	0	0	0	0	6	0	0	0	0	0	0	0	183	182	0	0
73418	5	010319	horn	lock	0	0	0	0	2	0	0	0	0	0	0	0	193	181	0	0
73438	5	010319	horn	lock	0	0	0	0	49	0	0	0	0	0	0	0	194	183	0	0
17589	5	010319	horn	free	0	10	0	0	78	0	0	188	0	4	0	0	0	180	0	0
17594	5	010319	horn	free	15	5	0	0	0	0	14	0	0	3	0	0	193	48	0	0
45829	5	010319	horn	free	8	8	0	0	2	12	5	0	3	0	0	0	193	134	0	0
73496	5	010319	horn	free	22	1	0	0	0	0	9	0	0	0	0	0	181	0	0	0
73497	5	010319	horn	free	21	0	0	33	0	0	7	0	0	0	0	0	195	25	0	0
98063	5	010319	horn	free	0	8	0	0	2	0	5	0	2	0	0	0	188	154	0	0
17590	5	010319	mix	lock	0	0	0	2	14	0	0	0	5	0	0	0	186	177	0	0
24308	5	010319	mix	lock	0	0	0	0	22	0	0	0	0	0	0	0	183	180	0	0
32359	5	010319	mix	lock	0	0	0	0	5	0	0	0	0	0	0	4	186	177	0	0
45886	5	010319	mix	lock	0	25	0	2	97	0	0	0	6	0	0	0	185	185	0	0
45889	5	010319	mix	lock	0	0	0	0	98	0	0	0	14	0	0	0	192	184	0	0
98023	5	010319	mix	lock	0	0	0	2	3	0	0	0	3	0	0	0	188	186	0	0
17508	5	010319	mix	free	0	0	0	0	6	0	0	178	7	0	0	0	0	174	0	0
45847	5	010319	mix	free	42	0	0	0	0	0	51	0	0	4	0	0	198	25	0	0
45859	5	010319	mix	free	4	62	0	0	4	0	0	77	11	0	0	0	120	178	0	0
73471	5	010319	mix	free	24	0	0	0	4	0	3	0	0	13	0	1	96	39	0	0
98062	5	010319	mix	free	5	21	0	0	16	8	2	0	0	3	0	0	165	133	0	0
98073	5	010319	mix	free	0	10	0	0	40	0	5	0	7	0	0	0	181	164	0	0
17547	6	060319	horn	lock	0	0	0	0	149	0	0	0	0	0	0	0	188	180	0	0
45805	6	060319	horn	lock	0	0	0	0	57	0	0	0	0	0	0	0	194	178	0	0
45827	6	060319	horn	lock	0	0	0	1	59	0	0	0	13	0	0	0	191	182	0	0
45890	6	060319	horn	lock	0	0	0	0	0	0	0	0	0	0	0	0	194	182	0	0
73418	6	060319	horn	lock	0	0	0	0	7	0	0	0	0	0	0	0	198	187	0	0
73438	6	060319	horn	lock	0	0	0	3	66	0	0	0	0	0	0	0	193	181	0	0
17589	6	060319	horn	free	10	1	0	0	14	0	1	0	0	0	0	0	180	156	0	0
17594	6	060319	horn	free	28	1	0	0	0	0	6	0	0	0	0	0	179	67	0	0
45829	6	060319	horn	free	13	0	0	0	0	0	6	0	0	0	0	0	182	63	0	0
73496	6	060319	horn	free	30	1	0	13	0	0	21	0	0	0	0	0	181	0	0	0
73497	6	060319	horn	free	0	0	0	12	0	0	7	0	0	0	0	0	193	122	0	0
98063	6	060319	horn	free	0	0	0	0	38	0	0	198	0	0	0	0	0	176	0	0
17590	6	060319	mix	lock	0	0	0	0	60	0	0	0	0	0	0	0	185	181	0	0
24308	6	060319	mix	lock	0	0	0	0	10	0	0	0	7	0	0	0	182	175	0	0
32359	6	060319	mix	lock	0	0	0	0	0	0	0	0	1	10	0	0	179	175	0	0
45886	6	060319	mix	lock	0	0	0	0	94	0	0	0	4	0	0	0	183	183	0	0
45889	6	060319	mix	lock	0	0	0	1	103	0	0	0	0	0	0	0	189	185	0	0
98023	6	060319	mix	lock	0	0	0	0	0	0	0	0	0	0	0	0	182	179	0	0
17508	6	060319	mix	free	0	0	0	0	58	0	0	180	0	0	0	0	0	177	0	0
45847	6	060319	mix	free	33	0	0	1	12	0	9	0	0	2	0	0	198	127	0	0
45859	6	060319	mix	free	5	0	0	3	28	0	0	0	0	0	0	0	185	167	0	0
73471	6	060319	mix	free	15	0	0	0	4	0	1	0	6	5	0	0	186	148	0	0
98062	6	060319	mix	free	2	15	0	0	0	6	1	0	54	15	0	7	194	173	0	0
98073	6	060319	mix	free	0	19	0	1	81	5	4	0	7	1	0	0	126	120	0	0
17547	7	230319	horn	lock	0	0	0	0	145	0	0	0	0	0	0	0	198	188	0	0
45805	7	230319	horn	lock	0	0	0	0	54	0	0	0	0	0	0	0	192	180	0	0
45827	7	230319	horn	lock	0	0	0	0	3	0	0	0	0	0	0	0	189	179	0	0
45890	7	230319	horn	lock	0	0	0	0	11	0	0	0	0	0	0	0	183	182	0	0
73418	7	230319	horn	lock	0	0	0	0	32	0	0	0	0	0	0	0	189	176	0	0
73438	7	230319	horn	lock	0	0	0	1	90	0	0	0	0	0	0	0	192	181	0	0
17589	7	230319	horn	free	0	20	0	4	27	30	0	0	12	0	0	0	180	143	0	0
17594	7	230319	horn	free	10	4	0	0	0	0	2	0	0	0	0	0	181	104	0	0
45829	7	230319	horn	free	0	0	0	0	56	0	0	180	0	0	0	0	0	179	0	0
73496	7	230319	horn	free	0	1	0	0	0	0	0	184	0	1	0	0	0	153	0	0
73497	7	230319	horn	free	7	2	1	6	0	0	1	0	0	0	0	0	170	98	0	0
98063	7	230319	horn	free	0	5	0	0	31	0	2	0	0	0	0	0	180	154	0	0
17590	7	230319	mix	lock	0	0	0	0	38	0	0	0	5	0	0	0	182	179	0	0
24308	7	230319	mix	lock	0	0	0	1	21	0	0	0	2	0	0	0	179	177	0	0
32359	7	230319	mix	lock	0	0	0	1	2	0	0	0	5	0	0	0	185	177	0	0
45886	7	230319	mix	lock	0	0	0	0	13	0	0	0	1	0	0	0	179	177	0	0
45889	7	230319	mix	lock	0	0	0	0	98	0	0	0	0	0	0	0	182	181	0	0
98023	7	230319	mix	lock	0	0	0	0	21	0	0	0	3	0	0	0	181	181	0	0
17508	7	230319	mix	free	0	0	0	0	29	0	0	179	0	0	0	0	0	179	0	0
45847	7	230319	mix	free	44	2	0	5	5	0	26	0	0	0	0	0	193	69	0	0
45859	7	230319	mix	free	0	57	0	0	11	0	0	184	19	2	0	0	0	176	0	0
73471	7	230319	mix	free	6	0	0	0	4	0	0	0	6	13	0	0	176	137	0	0
98062	7	230319	mix	free	4	12	0	0	15	2	0	0	7	0	0	7	181	174	0	0
98073	7	230319	mix	free	16	3	0	0	62	6	1	0	13	2	0	0	184	158	0	0

## Sheet: behav_frequencies
ID	treatment record	date	herd	treatment	avoidance	exploperson	headplay	headshake	headtowardsperson	lickperson	looktowardsperson	lying	neckstretching	notvisible	reprimand	rubperson	standing	stroking	threat	walkaway
17547	1	300119	horn	lock	0	0	0	0	7	0	0	0	0	0	0	0	1	1	0	0
45805	1	300119	horn	lock	0	0	0	0	9	0	0	0	1	0	0	0	1	1	0	0
45827	1	300119	horn	lock	0	0	0	0	6	0	0	0	0	0	0	0	1	1	0	0
45890	1	300119	horn	lock	0	0	0	0	9	0	0	0	0	0	0	0	1	1	0	0
73418	1	300119	horn	lock	0	0	0	1	6	0	0	0	1	0	0	0	1	1	0	0
73438	1	300119	horn	lock	0	0	0	1	4	0	0	0	0	0	0	0	1	1	0	0
17589	1	300119	horn	free	2	3	0	0	2	0	1	0	0	1	0	0	1	3	0	0
17594	1	300119	horn	free	1	1	0	0	0	0	9	0	0	0	0	0	1	0	0	0
45829	1	300119	horn	free	0	0	0	0	0	0	0	1	4	0	0	0	0	2	0	0
73496	1	300119	horn	free	3	0	0	0	0	0	1	0	0	0	0	0	3	0	0	0
73497	1	300119	horn	free	3	1	0	4	0	0	8	0	0	1	0	0	1	0	0	1
98063	1	300119	horn	free	0	7	0	0	0	0	1	0	1	0	0	0	1	2	0	0
17590	1	300119	mix	lock	0	0	0	0	2	0	0	0	3	0	0	0	1	1	0	0
24308	1	300119	mix	lock	0	0	0	2	0	0	0	0	0	0	0	0	1	1	0	0
32359	1	300119	mix	lock	0	0	0	0	4	0	0	0	1	0	0	0	1	1	0	0
45886	1	300119	mix	lock	0	0	0	1	10	0	0	0	1	0	0	0	1	1	0	0
45889	1	300119	mix	lock	0	1	0	2	7	0	0	0	1	0	0	0	1	1	0	0
98023	1	300119	mix	lock	0	0	0	0	4	0	0	0	0	0	0	0	1	1	0	0
17508	1	300119	mix	free	0	0	0	1	0	0	0	1	0	0	0	0	0	5	0	0
45847	1	300119	mix	free	4	1	0	0	0	0	6	0	0	3	0	0	2	0	0	1
45859	1	300119	mix	free	1	1	0	2	0	0	1	1	0	0	0	0	1	3	0	1
73471	1	300119	mix	free	3	4	0	0	0	0	5	0	0	0	0	0	1	1	0	0
98062	1	300119	mix	free	6	10	0	1	0	2	7	0	2	0	0	0	1	4	0	1
98073	1	300119	mix	free	2	5	0	0	0	0	14	0	0	0	0	0	3	1	0	1
17547	2	060219	horn	lock	0	0	0	5	13	0	0	0	2	0	0	0	1	1	0	0
45805	2	060219	horn	lock	0	0	0	0	4	0	0	0	0	0	0	0	1	1	0	0
45827	2	060219	horn	lock	0	0	0	0	6	0	0	0	1	0	0	0	1	1	0	0
45890	2	060219	horn	lock	0	0	0	0	0	0	0	0	0	0	0	0	1	1	0	0
73418	2	060219	horn	lock	0	1	0	1	4	0	0	0	1	0	0	0	1	1	0	0
73438	2	060219	horn	lock	0	0	0	1	8	0	0	0	0	0	0	0	1	1	0	0
17589	2	060219	horn	free	2	4	0	1	0	1	2	0	0	0	0	0	1	4	0	0
17594	2	060219	horn	free	4	0	0	0	0	0	0	0	0	0	0	0	1	0	0	0
45829	2	060219	horn	free	3	2	0	0	1	0	6	0	3	0	0	0	4	3	0	1
73496	2	060219	horn	free	3	0	0	0	0	0	9	0	0	0	0	0	2	0	0	0
73497	2	060219	horn	free	2	0	0	7	0	0	6	0	0	0	0	0	1	0	1	0
98063	2	060219	horn	free	1	4	0	0	0	0	4	1	0	0	0	0	2	4	0	0
17590	2	060219	mix	lock	0	0	0	0	0	0	0	0	0	1	0	0	1	1	0	0
24308	2	060219	mix	lock	0	0	0	1	0	0	0	0	0	0	0	0	1	1	0	0
32359	2	060219	mix	lock	0	0	0	0	2	0	0	0	0	0	0	0	1	1	0	0
45886	2	060219	mix	lock	0	0	0	0	9	0	0	0	1	0	0	0	1	1	0	0
45889	2	060219	mix	lock	0	0	0	0	12	0	0	0	2	0	0	0	1	1	0	0
98023	2	060219	mix	lock	0	0	0	0	2	0	0	0	0	0	0	0	1	1	0	0
17508	2	060219	mix	free	0	0	0	0	0	0	0	1	0	0	0	0	0	1	0	0
45847	2	060219	mix	free	0	0	0	0	0	0	0	1	0	0	0	0	0	0	0	0
45859	2	060219	mix	free	0	0	0	0	0	0	0	1	0	0	0	0	0	0	0	0
73471	2	060219	mix	free	8	1	0	0	0	0	2	0	2	2	0	0	1	8	0	0
98062	2	060219	mix	free	6	2	0	2	0	0	4	0	0	1	1	0	2	0	0	2
98073	2	060219	mix	free	0	1	0	0	0	0	2	1	1	0	0	0	0	5	0	0
17547	3	130219	horn	lock	0	0	0	0	2	0	0	0	2	0	0	0	1	1	0	0
45805	3	130219	horn	lock	0	0	0	0	3	0	0	0	0	0	0	0	1	1	0	0
45827	3	130219	horn	lock	0	0	0	0	3	0	0	0	0	0	0	0	1	1	0	0
45890	3	130219	horn	lock	0	0	0	0	2	0	0	0	0	0	0	0	1	1	0	0
73418	3	130219	horn	lock	0	0	0	0	0	0	0	0	0	0	0	0	1	1	0	0
73438	3	130219	horn	lock	0	0	0	1	5	0	0	0	0	0	0	0	1	1	0	0
17589	3	130219	horn	free	0	0	0	0	0	0	0	1	1	0	0	0	0	3	0	0
17594	3	130219	horn	free	4	2	0	0	0	0	11	0	0	0	0	0	2	0	2	1
45829	3	130219	horn	free	2	6	0	0	0	1	2	0	3	0	0	0	2	4	0	1
73496	3	130219	horn	free	0	0	0	0	0	0	0	1	0	0	0	0	0	1	0	0
73497	3	130219	horn	free	6	1	0	11	0	0	7	0	0	0	0	0	2	1	0	1
98063	3	130219	horn	free	0	2	0	0	0	0	1	0	0	0	0	0	1	4	0	0
17590	3	130219	mix	lock	0	0	0	1	7	0	0	0	2	0	0	0	1	1	0	0
24308	3	130219	mix	lock	0	0	0	0	0	0	0	0	0	0	0	0	1	1	0	0
32359	3	130219	mix	lock	0	0	0	0	0	0	0	0	0	0	0	0	1	1	0	0
45886	3	130219	mix	lock	0	0	0	0	7	0	0	0	7	0	0	3	1	1	0	0
45889	3	130219	mix	lock	0	0	0	0	7	0	0	0	1	0	0	0	1	1	0	0
98023	3	130219	mix	lock	0	0	0	0	10	0	0	0	1	0	0	0	1	1	0	0
17508	3	130219	mix	free	0	0	0	0	0	0	0	1	0	0	0	0	0	1	0	0
45847	3	130219	mix	free	1	0	0	0	0	0	6	0	0	1	0	0	1	0	0	0
45859	3	130219	mix	free	3	1	0	0	1	0	2	0	2	3	0	0	1	2	0	0
73471	3	130219	mix	free	7	2	0	0	0	0	11	0	0	0	0	0	1	2	0	0
98062	3	130219	mix	free	2	9	0	0	5	3	8	0	6	0	0	2	2	6	0	0
98073	3	130219	mix	free	12	6	0	3	0	0	14	0	0	0	0	0	2	0	0	1
17547	4	200219	horn	lock	0	0	0	0	5	0	0	0	0	0	0	0	1	1	0	0
45805	4	200219	horn	lock	0	0	0	0	7	0	0	0	1	0	0	1	1	1	0	0
45827	4	200219	horn	lock	0	0	0	0	4	0	0	0	3	0	0	0	1	1	0	0
45890	4	200219	horn	lock	0	0	0	0	0	0	0	0	0	0	0	0	1	1	0	0
73418	4	200219	horn	lock	0	0	0	1	3	0	0	0	1	0	0	0	1	1	0	0
73438	4	200219	horn	lock	0	0	0	0	9	0	0	0	1	0	0	0	1	1	0	0
17589	4	200219	horn	free	2	2	0	0	5	1	1	0	2	0	0	0	4	5	0	1
17594	4	200219	horn	free	5	0	0	0	0	0	4	0	0	0	0	0	1	0	0	0
45829	4	200219	horn	free	1	2	0	0	0	2	0	0	0	0	0	0	2	5	0	0
73496	4	200219	horn	free	0	0	0	0	0	0	0	1	0	0	0	0	0	1	0	0
73497	4	200219	horn	free	3	1	0	3	0	0	2	0	0	0	1	0	1	4	2	0
98063	4	200219	horn	free	0	3	0	0	1	0	1	0	0	0	0	0	2	5	0	0
17590	4	200219	mix	lock	0	0	0	3	5	0	0	0	1	0	0	0	1	1	0	0
24308	4	200219	mix	lock	0	0	0	1	2	0	0	0	0	0	0	0	1	1	0	0
32359	4	200219	mix	lock	0	0	0	0	1	0	0	0	0	0	0	0	1	1	0	0
45886	4	200219	mix	lock	0	1	0	0	8	1	0	0	1	0	0	0	1	1	0	0
45889	4	200219	mix	lock	0	0	0	0	6	0	0	0	0	0	0	0	1	1	0	0
98023	4	200219	mix	lock	0	0	0	0	0	0	0	0	0	0	0	0	1	1	0	0
17508	4	200219	mix	free	0	0	0	0	2	0	0	1	0	0	0	0	0	2	0	0
45847	4	200219	mix	free	1	0	0	0	0	0	3	1	0	0	0	0	1	1	0	0
45859	4	200219	mix	free	4	3	0	1	1	0	1	1	0	1	0	0	1	2	0	1
73471	4	200219	mix	free	4	1	0	0	0	0	1	0	3	1	0	0	1	8	0	0
98062	4	200219	mix	free	1	8	0	0	0	4	3	0	4	1	0	0	1	4	0	0
98073	4	200219	mix	free	0	8	0	0	0	0	1	1	3	1	0	0	0	3	0	0
17547	5	010319	horn	lock	0	0	0	0	2	0	1	0	2	0	0	0	1	1	0	0
45805	5	010319	horn	lock	0	0	0	2	9	0	0	0	1	0	0	0	1	1	0	0
45827	5	010319	horn	lock	0	0	0	0	3	0	0	0	0	0	0	0	1	1	0	0
45890	5	010319	horn	lock	0	0	0	0	3	0	0	0	0	0	0	0	1	1	0	0
73418	5	010319	horn	lock	0	0	0	0	1	0	0	0	0	0	0	0	1	1	0	0
73438	5	010319	horn	lock	0	0	0	0	3	0	0	0	0	0	0	0	1	1	0	0
17589	5	010319	horn	free	0	1	0	0	4	0	0	1	0	1	0	0	0	2	0	0
17594	5	010319	horn	free	8	2	0	0	0	0	6	0	0	1	0	0	3	3	0	0
45829	5	010319	horn	free	2	3	0	0	2	2	2	0	1	0	0	0	1	2	0	0
73496	5	010319	horn	free	5	1	0	0	0	0	4	0	0	0	0	0	3	0	0	0
73497	5	010319	horn	free	6	0	0	12	0	0	4	0	0	0	0	0	3	4	2	1
98063	5	010319	horn	free	0	3	0	0	1	0	1	0	1	0	0	0	1	6	0	0
17590	5	010319	mix	lock	0	0	0	1	6	0	0	0	2	0	0	0	1	1	0	0
24308	5	010319	mix	lock	0	0	0	0	5	0	0	0	0	0	0	0	1	1	0	0
32359	5	010319	mix	lock	0	0	0	0	2	0	0	0	0	0	0	1	1	2	0	0
45886	5	010319	mix	lock	0	5	0	1	14	0	0	0	2	0	0	0	1	1	0	0
45889	5	010319	mix	lock	0	0	0	0	9	0	0	0	2	0	0	0	1	1	0	0
98023	5	010319	mix	lock	0	0	0	1	2	0	0	0	1	0	0	0	1	1	0	0
17508	5	010319	mix	free	0	0	0	0	2	0	0	1	1	0	0	0	0	1	0	0
45847	5	010319	mix	free	7	0	0	0	0	0	11	0	0	2	0	0	1	2	0	0
45859	5	010319	mix	free	2	5	0	0	3	0	0	1	5	0	0	0	1	3	0	1
73471	5	010319	mix	free	5	0	0	0	2	0	1	0	0	3	0	1	1	4	1	0
98062	5	010319	mix	free	1	7	0	0	5	3	1	0	0	1	0	0	2	5	0	1
98073	5	010319	mix	free	0	7	0	0	9	0	3	0	2	0	0	0	2	3	0	0
17547	6	060319	horn	lock	0	0	0	0	1	0	0	0	0	0	0	0	1	1	0	0
45805	6	060319	horn	lock	0	0	0	0	4	0	0	0	0	0	0	0	1	2	0	0
45827	6	060319	horn	lock	0	0	0	1	8	0	0	0	3	0	0	0	1	1	0	0
45890	6	060319	horn	lock	0	0	0	0	0	0	0	0	0	0	0	0	1	1	0	0
73418	6	060319	horn	lock	0	0	0	0	3	0	0	0	0	0	0	0	1	1	0	0
73438	6	060319	horn	lock	0	0	0	2	10	0	0	0	0	0	0	0	1	1	0	0
17589	6	060319	horn	free	1	1	0	0	1	0	1	0	0	0	0	0	2	3	0	0
17594	6	060319	horn	free	9	1	0	0	0	0	5	0	0	0	0	0	2	5	0	0
45829	6	060319	horn	free	4	0	0	0	0	0	3	0	0	0	0	0	3	5	0	0
73496	6	060319	horn	free	9	1	0	6	0	0	8	0	0	0	0	0	2	0	0	0
73497	6	060319	horn	free	0	0	0	7	0	0	2	0	0	0	0	0	1	10	0	0
98063	6	060319	horn	free	0	0	0	0	3	0	0	1	0	0	0	0	0	2	0	0
17590	6	060319	mix	lock	0	0	0	0	8	0	0	0	0	0	0	0	1	1	0	0
24308	6	060319	mix	lock	0	0	0	0	6	0	0	0	2	0	0	0	1	3	0	0
32359	6	060319	mix	lock	0	0	0	0	0	0	0	0	1	2	0	0	1	1	0	0
45886	6	060319	mix	lock	0	0	0	0	11	0	0	0	3	0	0	0	1	1	0	0
45889	6	060319	mix	lock	0	0	0	1	8	0	0	0	0	0	0	0	1	1	0	0
98023	6	060319	mix	lock	0	0	0	0	0	0	0	0	0	0	1	0	1	2	0	0
17508	6	060319	mix	free	0	0	0	0	8	0	0	1	0	0	0	0	0	1	0	0
45847	6	060319	mix	free	3	0	0	1	5	0	3	0	0	1	0	0	3	4	0	1
45859	6	060319	mix	free	2	0	0	3	4	0	0	0	0	0	0	0	1	3	0	0
73471	6	060319	mix	free	4	0	0	0	2	0	1	0	1	2	0	0	1	5	0	0
98062	6	060319	mix	free	2	7	0	0	0	2	1	0	8	1	0	1	1	3	0	0
98073	6	060319	mix	free	0	7	0	1	14	2	3	0	3	1	0	0	2	2	0	0
17547	7	230319	horn	lock	0	0	0	0	5	0	0	0	0	0	0	0	1	1	0	0
45805	7	230319	horn	lock	0	0	0	0	5	0	0	0	0	0	0	0	1	1	0	0
45827	7	230319	horn	lock	0	0	0	0	1	0	0	0	0	0	0	0	1	1	0	0
45890	7	230319	horn	lock	0	0	0	0	2	0	0	0	0	0	0	0	1	1	0	0
73418	7	230319	horn	lock	0	0	0	0	4	0	0	0	0	0	0	0	1	2	0	0
73438	7	230319	horn	lock	0	0	0	1	4	0	0	0	0	0	0	0	1	1	0	0
17589	7	230319	horn	free	0	3	0	3	7	1	0	0	2	0	0	0	1	2	0	0
17594	7	230319	horn	free	4	2	0	0	0	0	1	0	0	0	0	0	2	5	0	0
45829	7	230319	horn	free	0	0	0	0	6	0	0	1	0	0	0	0	0	1	0	0
73496	7	230319	horn	free	0	1	0	0	0	0	0	1	0	1	0	0	0	1	0	0
73497	7	230319	horn	free	4	1	1	5	0	0	1	0	0	0	0	0	2	8	0	1
98063	7	230319	horn	free	0	3	0	0	3	0	1	0	0	0	0	0	2	4	0	0
17590	7	230319	mix	lock	0	0	0	0	6	0	0	0	1	0	0	0	1	1	0	0
24308	7	230319	mix	lock	0	0	0	2	3	0	0	0	1	0	0	0	1	1	0	0
32359	7	230319	mix	lock	0	0	0	1	1	0	0	0	2	0	0	0	1	1	0	0
45886	7	230319	mix	lock	0	0	0	0	3	0	0	0	1	0	0	0	1	1	0	0
45889	7	230319	mix	lock	0	0	0	0	10	0	0	0	0	0	0	0	1	1	0	0
98023	7	230319	mix	lock	0	0	0	0	4	0	0	0	1	0	0	0	1	1	0	0
17508	7	230319	mix	free	0	0	0	0	3	0	0	1	0	0	0	0	0	1	0	0
45847	7	230319	mix	free	11	2	0	3	4	0	8	0	0	0	1	0	3	3	0	0
45859	7	230319	mix	free	0	8	0	0	3	0	0	1	4	1	0	0	0	2	0	0
73471	7	230319	mix	free	1	0	0	0	1	0	0	0	1	1	0	0	1	3	0	1
98062	7	230319	mix	free	2	7	0	0	3	1	0	0	3	0	0	1	2	3	0	1
98073	7	230319	mix	free	4	2	0	0	9	1	1	0	4	1	0	0	2	6	0	1
